# Supplementary material for: Egg Viability, Mating Frequency and Male Mating Ability Evolve in Populations of Drosophila melanogaster Selected for Resistance to Cold Shock
Source: PubMed Central journal article supplement (PMC4466231; doi:10.1371/journal.pone.0129992), 2015-06-11

S2 Fig.

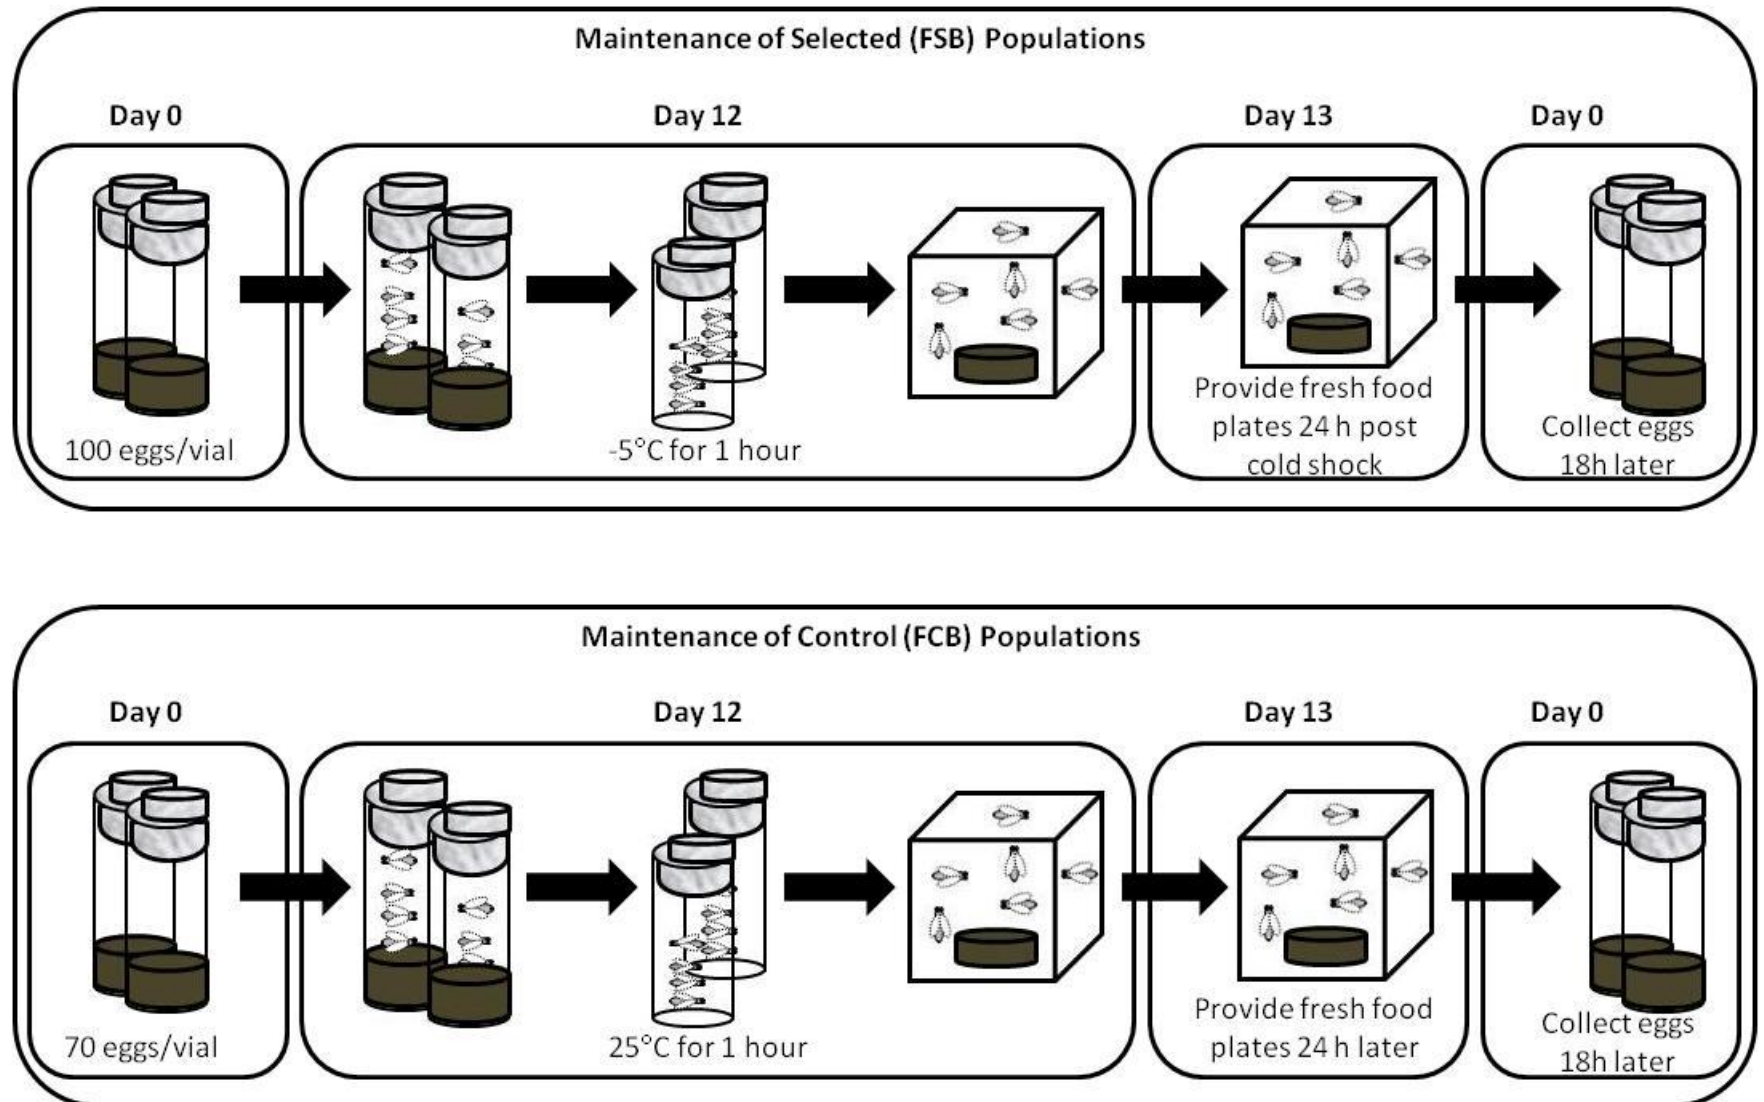

Supplement: pone.0129992.s002.pdf [file pone.0129992.s002.pdf]
